# Supplementary material for: Relative Importance of High-Latitude Local and Long-Range Transported Dust to Arctic Ice Nucleating Particles and Impacts on Arctic Mixed-Phase Clouds
Source: Copernicus journal article supplement (doi:10.5194/acp-2021-621), 2021-08-05
Supplement: Supplementary file 1 [file acp-2021-621-supplement.pdf]

- 1 *Supplement of*
- 2 **Relative Importance of High-Latitude Local and Long-Range Transported**
- 3 **Dust to Arctic Ice Nucleating Particles and Impacts on Arctic Mixed-Phase**
- 4 **Clouds**
- 5 Yang Shi et al.
- 6 *Correspondence to:* Xiaohong Liu (xiaohong.liu@tamu.edu)

7 **Table S1.** Arctic burden efficiency ( $1e-3 \text{ mg m}^{-2}$ ) ( $\text{mg m}^{-2} \text{ s}^{-1}$ )<sup>-1</sup>.

|     | Annual | MAM   | JJA   | SON   | DJF   |
|-----|--------|-------|-------|-------|-------|
| Arc | 15.88  | 20.96 | 20.82 | 10.49 | 15.10 |
| NAm | 1.99   | 2.78  | 3.78  | 1.68  | 0.84  |
| NAf | 0.62   | 1.11  | 0.50  | 0.35  | 0.32  |
| CAs | 2.58   | 2.66  | 4.11  | 2.51  | 1.01  |
| MSA | 0.76   | 1.50  | 0.45  | 0.49  | 0.63  |
| EAs | 2.42   | 2.19  | 2.99  | 2.02  | 2.75  |
| RoW | 0.00   | 0.00  | 0.00  | 0.00  | 0.01  |

9 **Table S2.** Yearly (2007 to 2011) averaged HLD emission flux ( $\text{Tg yr}^{-1}$ ) in CTRL and HLD\_half.

|      | CTRL  | HLD_half |
|------|-------|----------|
| 2007 | 129.2 | 64.2     |
| 2008 | 213.8 | 103.4    |
| 2009 | 114.2 | 50.8     |
| 2010 | 127.1 | 53.2     |
| 2011 | 137.8 | 56.7     |

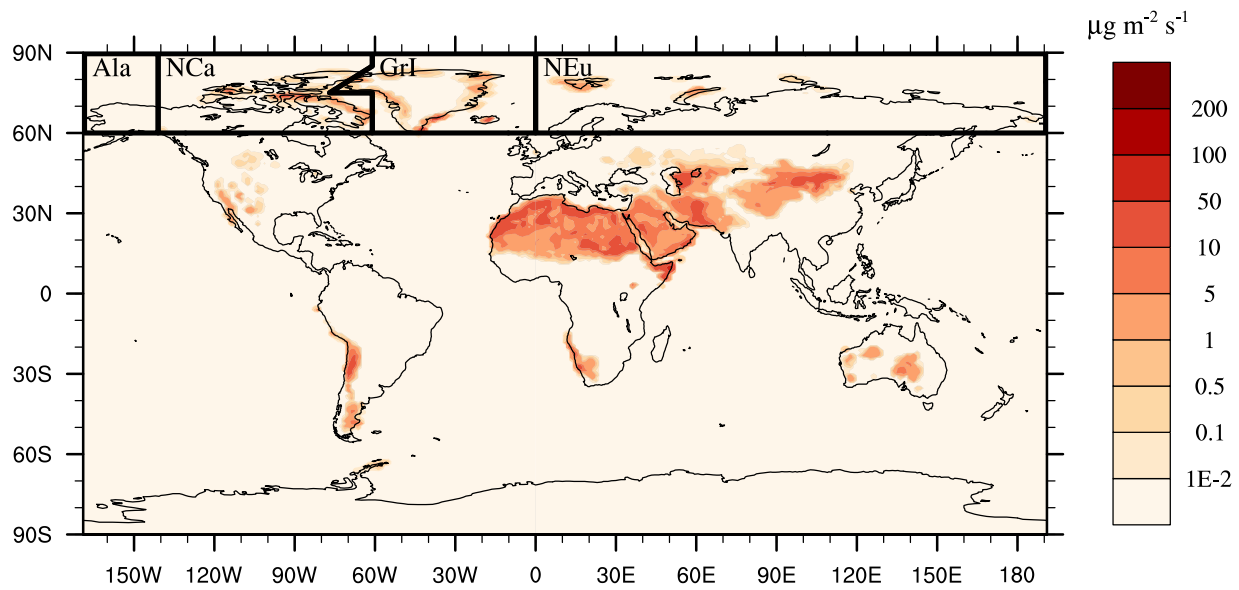

11

12 **Figure S1.** Same as Figure 1a, but with four sub-sources tagged in the Arctic (Ala: Alaska, NCa:  
 13 North Canada; GrI: Greenland and Iceland; NEu: North Eurasia).

14

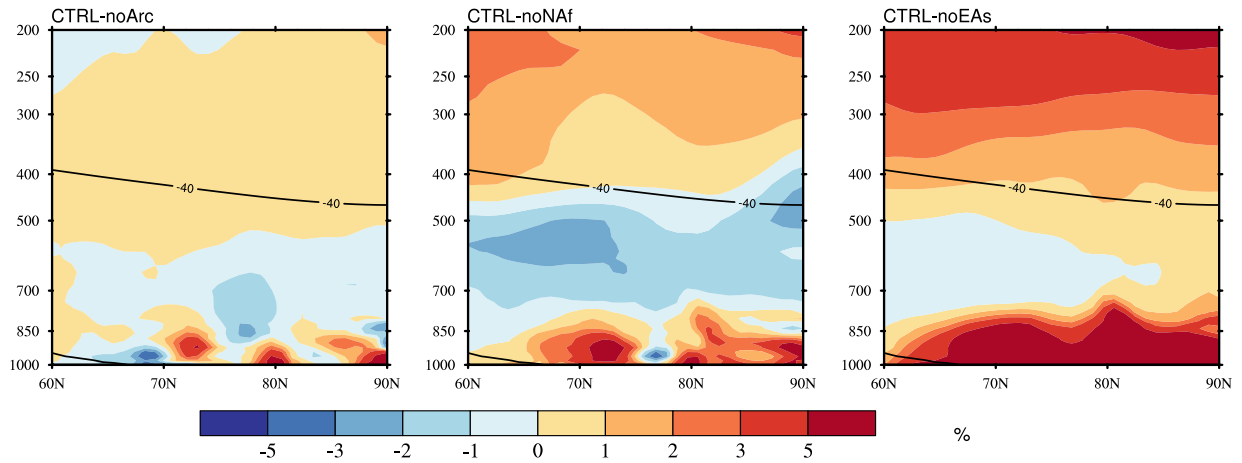

15

16 **Figure S2.** Percentage difference of zonal averaged dust concentration between CTRL and  
 17 sensitivity experiments (i.e., noArc, noNAf, noEAs). Black contours are zonal averaged  
 18 temperatures in °C.

19

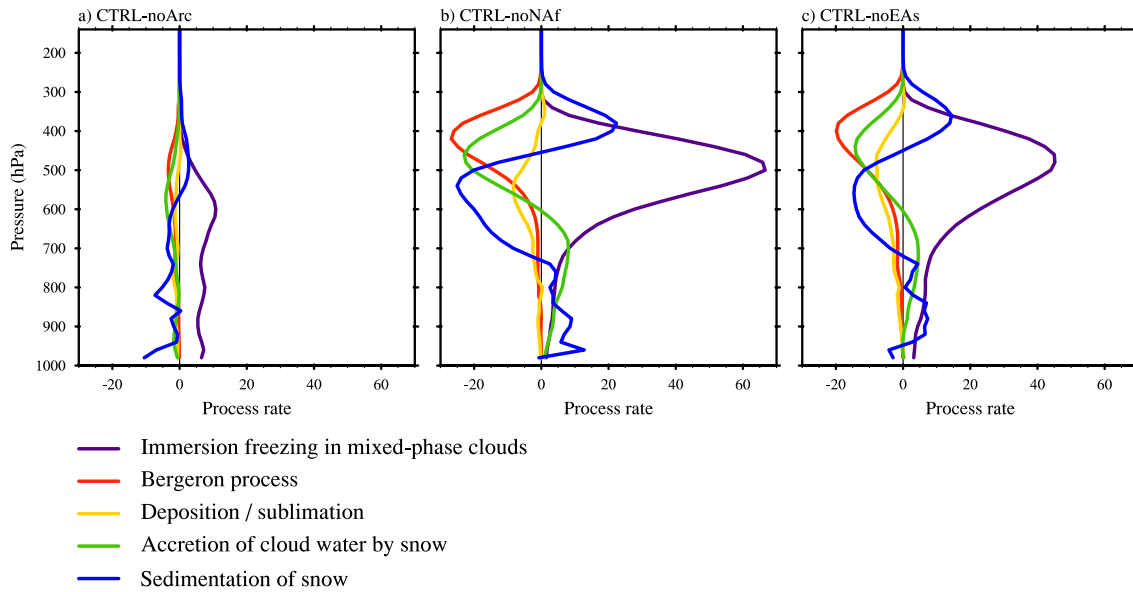

20

21 **Figure S3.** Process budget analysis associated with total ice water tendencies from cloud  
 22 microphysical processes in the Arctic (unit:  $1e-3 \mu\text{g kg}^{-1} \text{s}^{-1}$ ). Only the processes that have large  
 23 changes are shown in this figure.

24

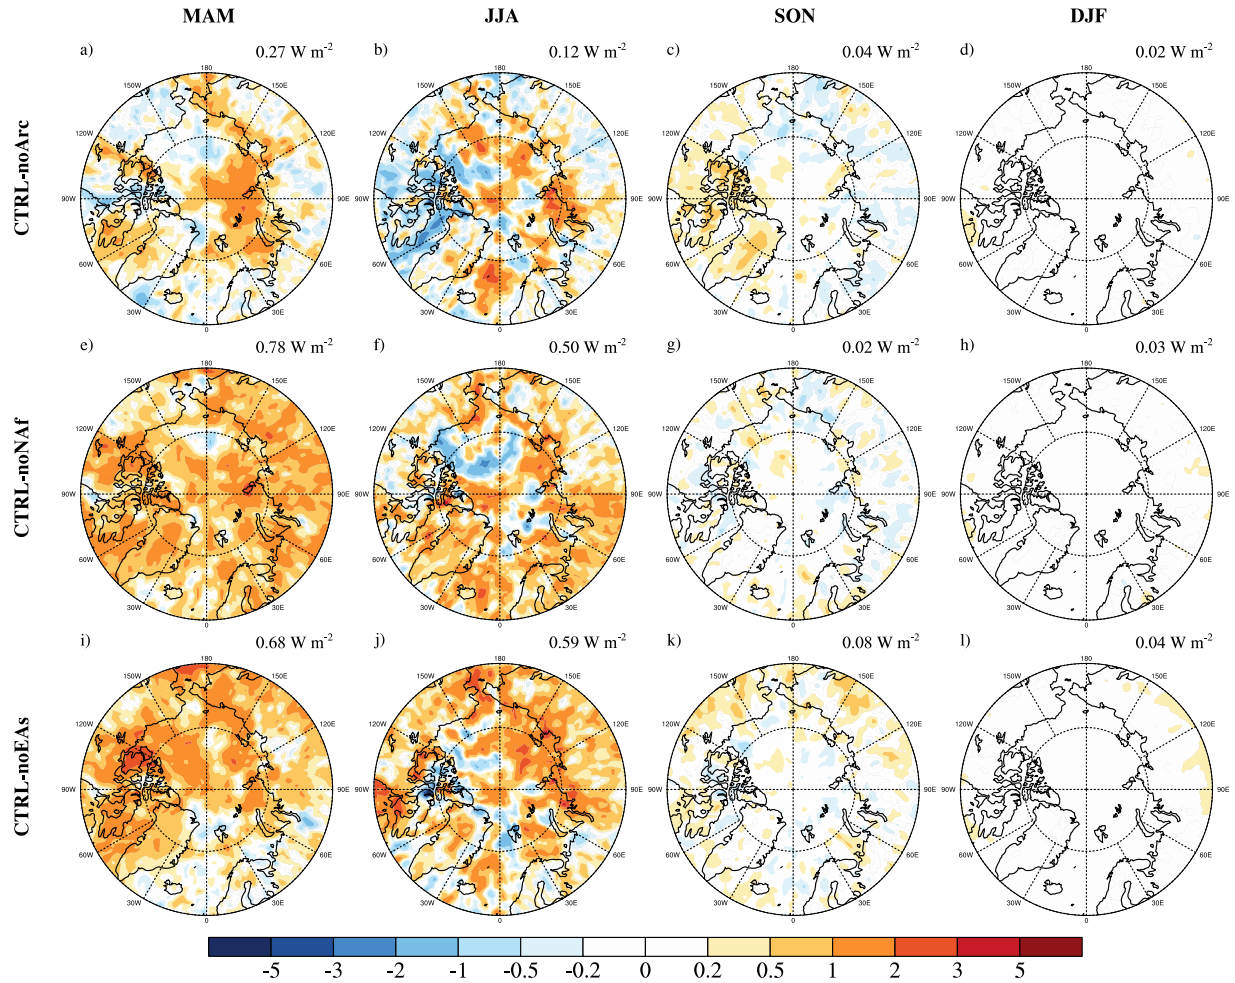

25

26 **Figure S4.** Seasonal changes in shortwave downwelling radiative flux at the surface (unit:  $\text{W m}^{-2}$ )  
 27 caused by dust INPs from Arctic (top panel), North Africa (middle panel), and East Asia (bottom  
 28 panel). The numbers are averaged radiative flux differences in the Arctic.

29

30

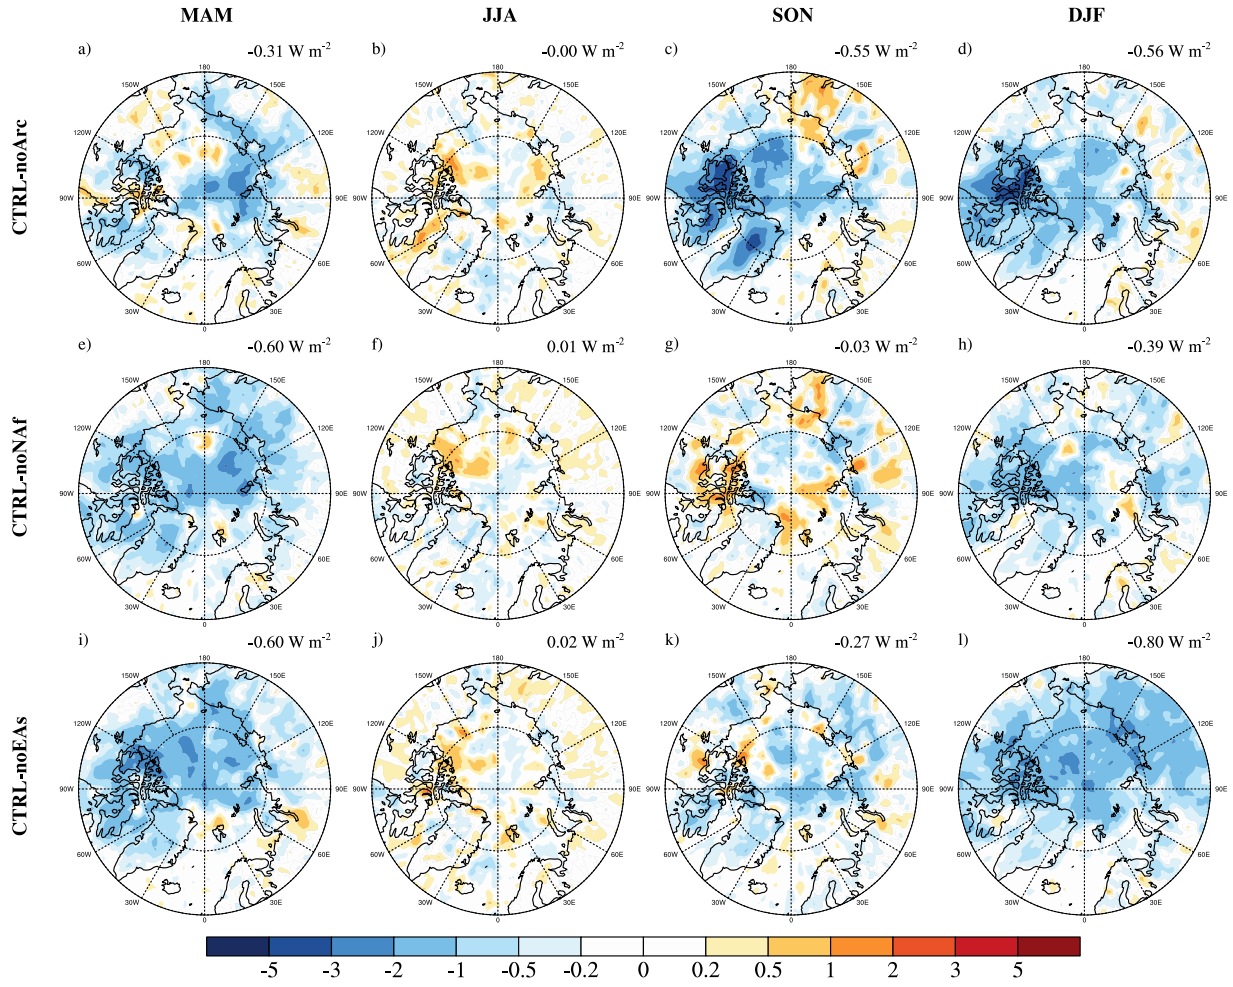

31

32 **Figure S5.** Same as Figure S4, but for longwave downwelling radiative flux.

33



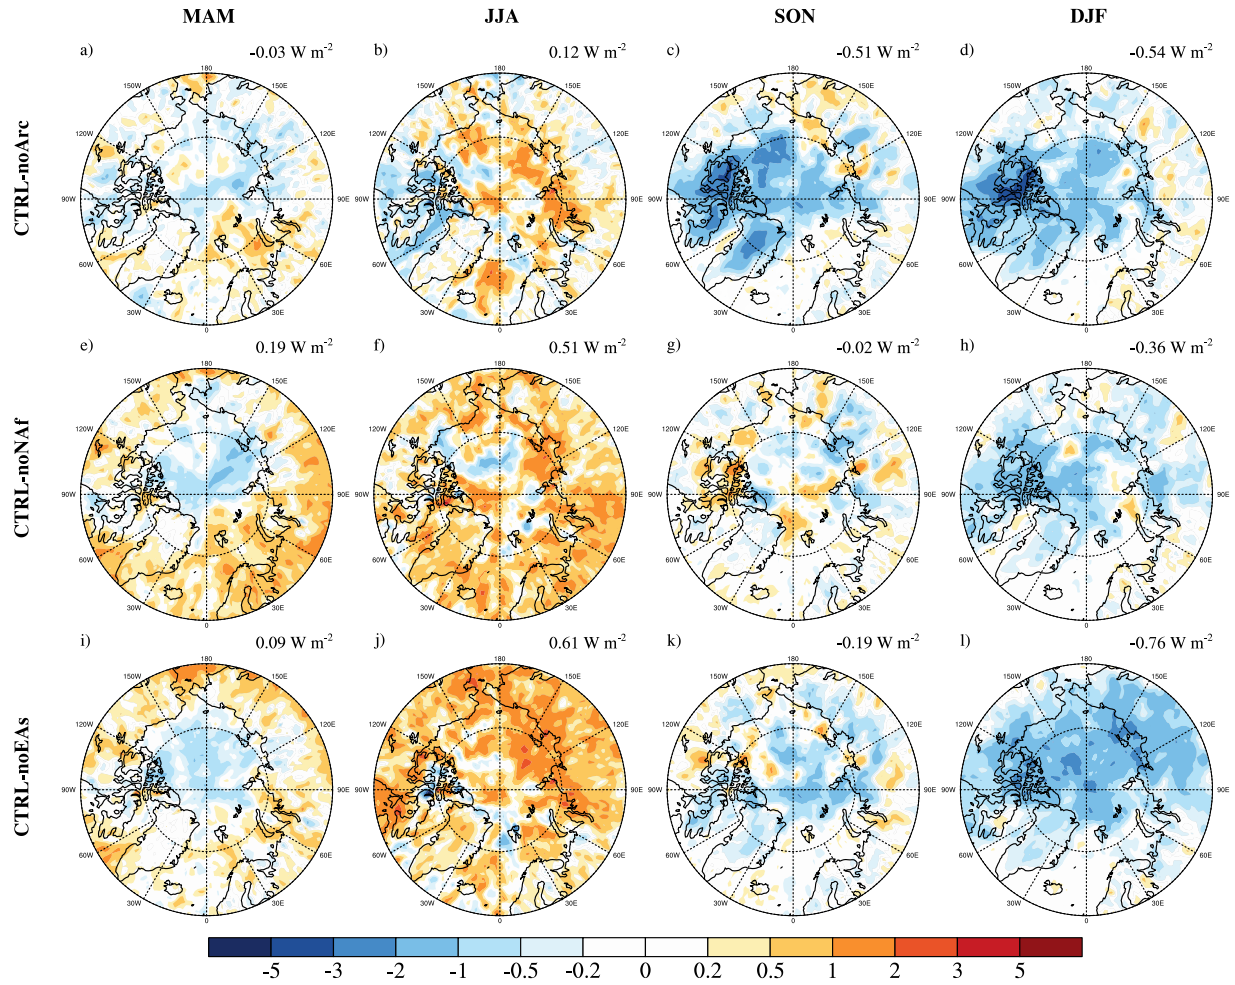

34

35 **Figure S6.** Same as S4, but for net downwelling radiative flux.

36

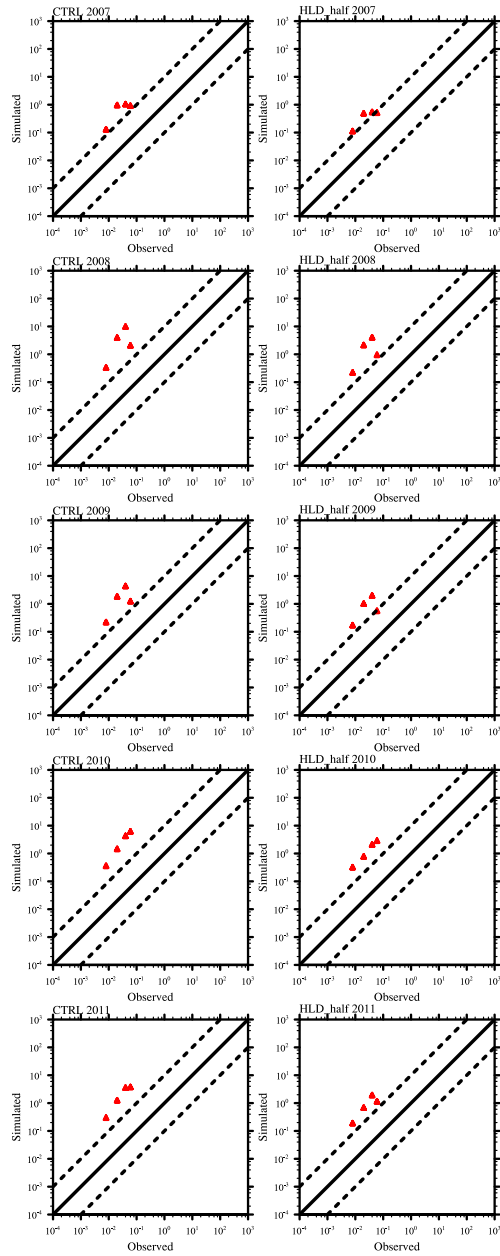

37

38 **Figure S7.** Yearly (2007 to 2011) comparisons of dust deposition fluxes in the Arctic  
 39 (Greenland) for CTRL and HLD\_half. The locations of the markers are shown by the red  
 40 triangles on Figure 2d. Unit:  $\text{g m}^{-2} \text{ yr}^{-1}$ .

41

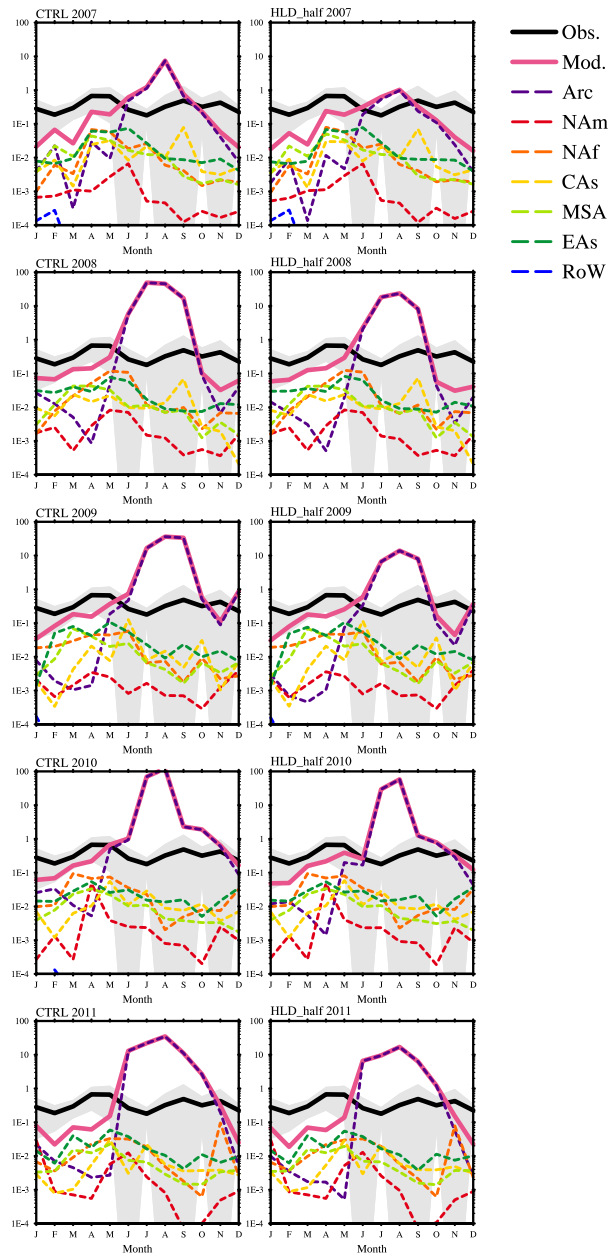

42

43 **Figure S8.** Yearly (2007 to 2011) comparisons of surface dust concentrations at Alert station for

44 CTRL and HLD\_half. Unit:  $\mu\text{g m}^{-3}$ .

45
